# Supplementary material for: Meta-Analysis of Isolated Hepatic Perfusion and Percutaneous Hepatic Perfusion as a Treatment for Uveal Melanoma Liver Metastases
Source: MDPI journal article supplement (doi:10.3390/cancers13184726), 2021-09-21
Supplement: s1 [file s1]

### Supplement 1 - full-text article selection process

As mentioned in the results section of the main text, 35 articles were screened and assessed for eligibility. In this process five articles without relevant data were excluded first; Buzzaco *et al* because of high selection bias and not reporting survival data [32]. Heusner *et al* and Ludwig *et al* because they were only reporting on trans-arterial chemoperfusion [31, 33]. Pingpank *et al* conducted a Phase I study without reporting survival data [30]. Teal *et al* published a case report without actual survival data [34].

Then all articles were excluded that did not report a subset of uveal melanoma patients separately; Abbot *et al*, Magge *et al* and Hughes *et al* (the only phase III trial published on hepatic perfusion so far) did a combined report of patients with liver metastases from both uveal and cutaneous melanoma [37, 39, 40]. While Dewald *et al*, Rizell *et al*, Vogl *et al* and Libutti *et al* combined patients with liver metastases from uveal melanoma and patients with liver metastases from other cancers in their reports [35, 36, 38, 41].

Finally, all remaining articles were grouped with their research group or reporting hospital and compared to check for possible overlaps in reported patients by looking at years of inclusion. After this comparison only the articles with the highest number of patients reported from each research group or reporting hospital were included. This led to the exclusion of 14 articles, further specified in the four tables below:

**Table S1.** Studies from the Netherlands

| 1 <sup>st</sup> Author | Year        | Included | No. of Centres (City) | Number of Patients | Technique | Years of inclusion |
|------------------------|-------------|----------|-----------------------|--------------------|-----------|--------------------|
| Noter [43]             | 2004        | No       | 1 (Leiden)            | 8                  | IHP       | 1999 - 2002        |
| van Iersel [44]        | 2008        | No       | 1 (Leiden)            | 13                 | IHP       | 1995 - 2006        |
| van Iersel [45]        | 2014        | No       | 1 (Leiden)            | 3                  | IHP       | 2007 - 2008        |
| de Leede [63]          | 2016        | Yes      | 2 (Leiden, Rotterdam) | 31                 | IHP       | 1999 - 2009        |
| Meijer [64, 65]        | 2019 + 2021 | Yes      | 1 (Leiden)            | 35                 | PHP       | 2014 - 2017        |
| van Etten [46]         | 2004        | No       | 2 (Rotterdam)         | 1                  | IHP       | ?                  |
| Verhoef [47]           | 2008        | No       | 2 (Rotterdam)         | 1                  | IHP       | ?                  |
| van Etten [48]         | 2009        | No       | 2 (Rotterdam)         | 8                  | IHP       | 2002 - 2006        |

**Table S2.** Studies from Germany

| 1 <sup>st</sup> Author | Year | Included | No. of Centres (City)                                                  | Number of Patients | Technique | Years of inclusion |
|------------------------|------|----------|------------------------------------------------------------------------|--------------------|-----------|--------------------|
| Brüning [59]           | 2020 | Yes      | 1 (Hamburg)                                                            | 19                 | PHP       | 2014 - 2019        |
| Dewald [60]            | 2021 | Yes      | 1 (Hannover)                                                           | 30                 | PHP       | 2014 - 2019        |
| Kirstein [49]          | 2017 | No       | 1 (Hannover)                                                           | 11                 | PHP       | 2014 - 2016        |
| Vogl [50]              | 2017 | No       | 7 (Berlin, Frankfurt, Trier, Göttingen, Hamburg, Hannover, Heidelberg) | 18                 | PHP       | 2012 - 2016        |
| Schönfeld [51]         | 2020 | No       | 1 (Hannover)                                                           | 30                 | PHP       | 2014 - 2019        |
| Artzner [52]           | 2019 | No       | 1 (Tübingen)                                                           | 16                 | PHP       | 2015 - 2018        |
| Estler [61]            | 2021 | Yes      | 1 (Tübingen)                                                           | 29                 | PHP       | 2015 - 2020        |

**Table S3.** Studies from Sweden

| <b>1<sup>st</sup> Author</b> | <b>Year</b> | <b>Included</b> | <b>No. of Centres<br/>(City)</b> | <b>Number of<br/>Patients</b> | <b>Technique</b> | <b>Years of<br/>inclusion</b> |
|------------------------------|-------------|-----------------|----------------------------------|-------------------------------|------------------|-------------------------------|
| Olofsson [53]                | 2014        | No              | 1 (Göteborg)                     | 34                            | IHP              | 2005 - 2011                   |
| Ben-Shabat [58]              | 2016        | Yes             | 1 (Göteborg)                     | 68                            | IHP              | 1989 - 2013                   |

**Table S4.** Studies from the United States of America and the United Kingdom

| <b>1<sup>st</sup> Author</b> | <b>Year</b> | <b>Included</b> | <b>No. of Centres<br/>(City)</b>   | <b>Number of<br/>Patients</b> | <b>Technique</b> | <b>Years of<br/>inclusion</b> |
|------------------------------|-------------|-----------------|------------------------------------|-------------------------------|------------------|-------------------------------|
| Forster [54]                 | 2014        | No              | 1 (Tampa, FL)                      | 5                             | PHP              | 2008 - 2013                   |
| Karydis [62]                 | 2018        | Yes             | 2 (Tampa, FL &<br>Southampton, UK) | 51                            | PHP              | 2008 - 2016                   |
| Alexander [55]               | 2000        | No              | 1 (Bethesda, MD)                   | 22                            | IHP              | 1994 - 1999                   |
| Alexander [57]               | 2003        | Yes             | 1 (Bethesda, MD)                   | 29                            | IHP              | 1997 - 2002                   |
| Varghese [56]                | 2010        | No              | 1 (Bethesda, MD)                   | 17                            | IHP              | ?                             |

FL: Florida, UK: United Kingdom, MD: Maryland
